# Supplementary material for: Regulating the size and spatial distribution of Pd nanoparticles supported by the defect engineered metal–organic framework HKUST-1 and applied in the aerobic oxidation of cinnamyl alcohol
Source: Royal Society of Chemistry journal article supplement (doi:10.1039/c9cy00560a), 2019-01-01
Supplement: c9cy00560a1.pdf [file c9cy00560a1.pdf]

Electronic Supplementary Information:

**Regulating the size and spatial distribution of Pd nanoparticles supported by the defect engineered Metal-Organic Framework HKUST-1 and applied in the aerobic oxidation of cinnamyl alcohol**

Penghu Guo,<sup>a</sup> Qi Fu,<sup>a</sup> Ceylan Yildiz,<sup>a</sup> Yen-Ting Chen,<sup>a</sup> Kevin Ollegott,<sup>a</sup> Christian Froese,<sup>a,b</sup> Wolfgang Kleist,<sup>a</sup> Roland A. Fischer,<sup>c</sup> Yuemin Wang,<sup>\*d</sup> Martin Muhler<sup>a,b</sup> and Baoxiang Peng<sup>\*a,b</sup>

<sup>a</sup> *Laboratory of Industrial Chemistry, Ruhr-University Bochum, Universitätsstrasse 150, 44801 Bochum (Germany).*

<sup>b</sup> *Max Planck Institute for Chemical Energy Conversion, 45470 Mülheim an der Ruhr, Germany*

<sup>c</sup> *Chair of Inorganic and Metal-Organic Chemistry Department of Chemistry, Technical University of Munich, 85748 Garching, Germany*

<sup>d</sup> *Institute of Functional Interfaces, Karlsruhe Institute of Technology, 76344 Eggenstein-Leopoldshafen, Germany*

**Corresponding authors:**

\* E-mail: [yuemin.wang@kit.edu](mailto:yuemin.wang@kit.edu) (Y. W.)

\* E-mail: [baoxiang.peng@techem.rub.de](mailto:baoxiang.peng@techem.rub.de) (B. P.)

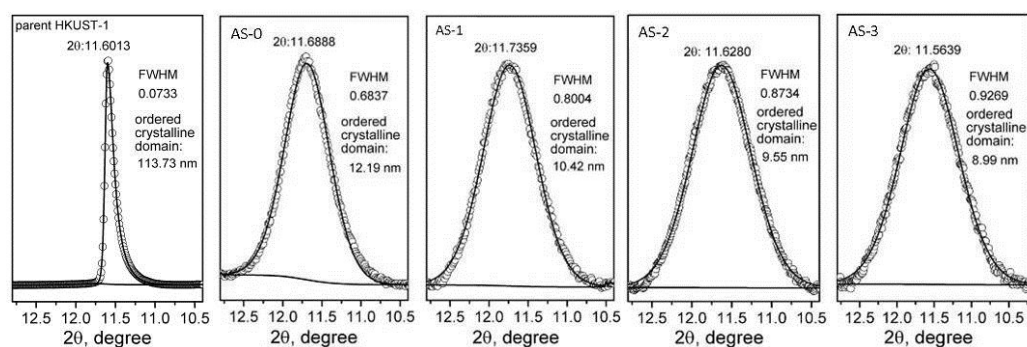

**Fig. S1** Mean size of ordered crystalline domains calculated by Scherrer Equation  $\tau = K\lambda/(B\cos\theta)$ , ( $K = 0.94$ ,  $\lambda = 0.15406$  nm) for parent HKUST-1, AS-0, AS-1, AS-2 and AS-3.

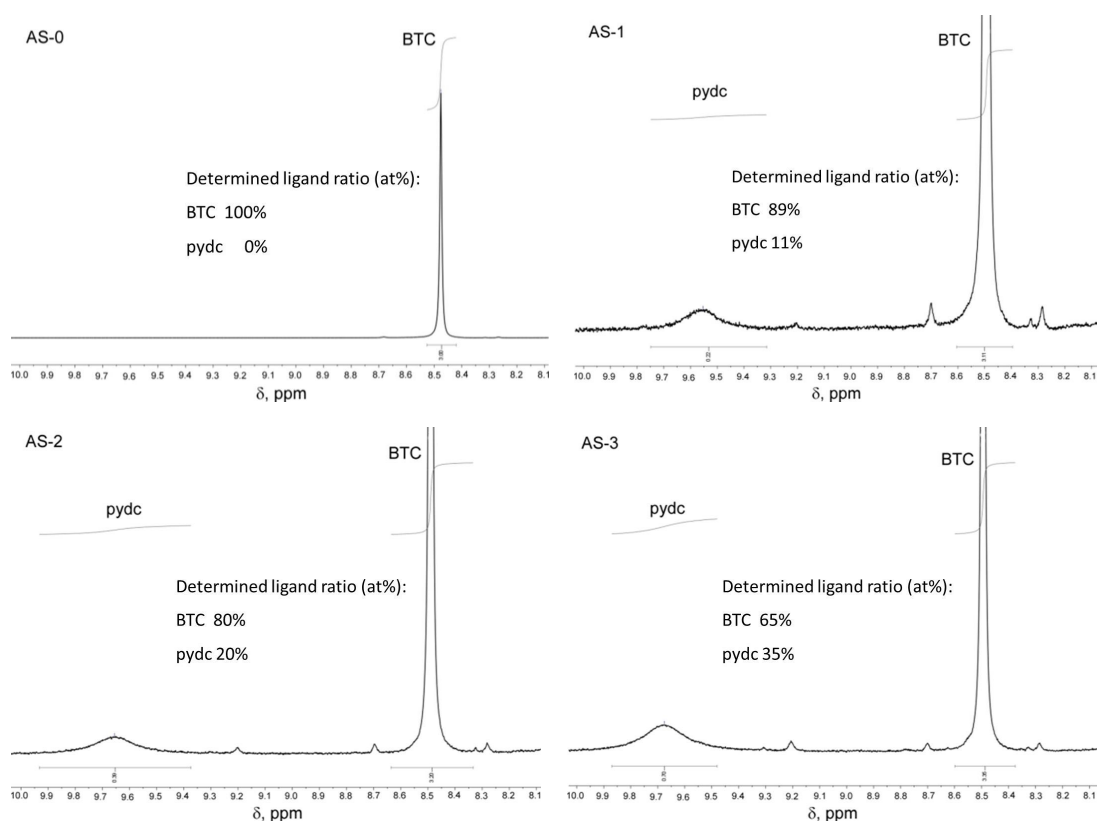

**Fig. S2** The  $^1\text{H-NMR}$  results for the AS-0, AS-1, AS-2 and AS-3 samples to determine the incorporated amount of pydc. Before the measurements, the samples were solvent-exchanged by acetone for five times and then activated at 403 K for 4 h.

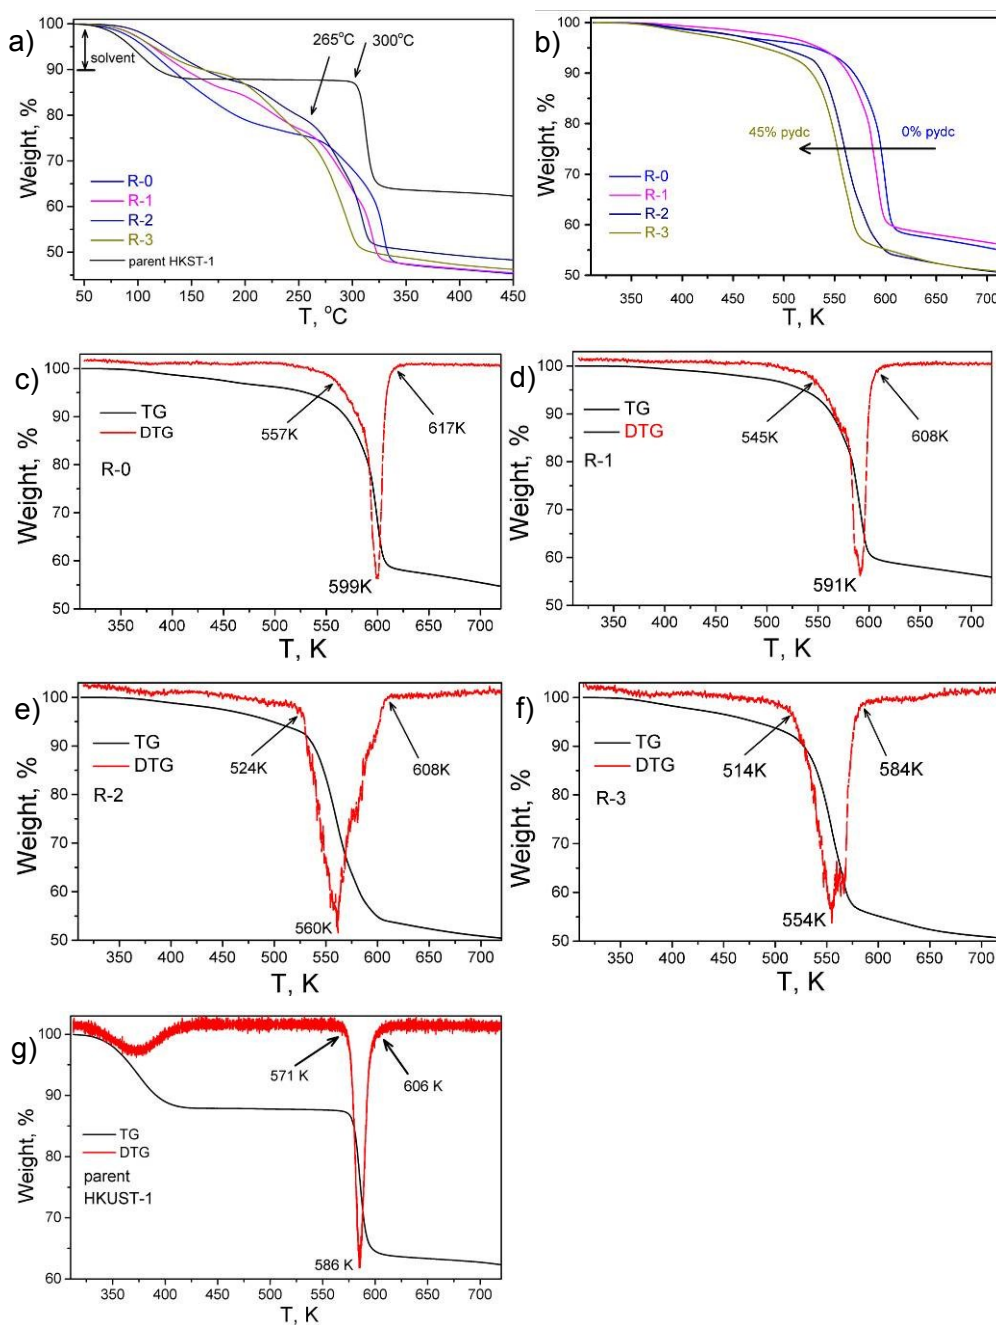

**Fig. S3** a) TG plots of freshly-prepared R-0 to R-3 samples and parent HKUST-1; b) TG plots of R-0 to R-3 samples pre-activated at 403 K. DTG plots for c) R-0 pre-activated at 403 K, d) R-1 pre-activated at 403 K, e) R-2 pre-activated at 403 K, f) R-3 pre-activated at 403 K and g) as-synthesized parent HKUST-1. The heating ramp was 5 K/min.

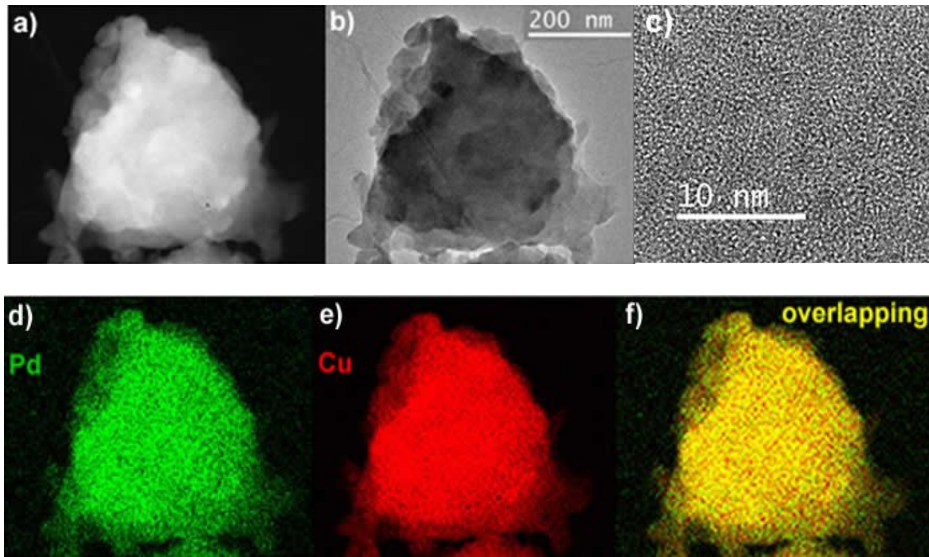

**Fig. S4** a) STEM-HAADF image, b) TEM image, c) magnified TEM image, d) palladium mapping, e) copper mapping and f) palladium and copper overlapping for as-synthesized AS-0 (0% pydc) sample.

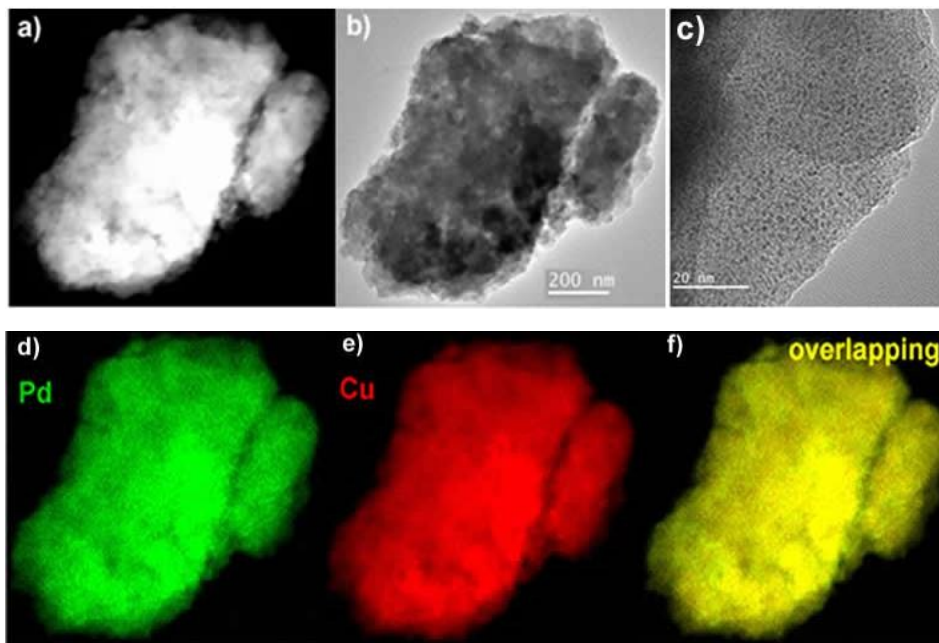

**Fig. S5** a) STEM-HAADF image, b) TEM image, c) magnified TEM image, d) palladium mapping, e) copper mapping and f) palladium and copper overlapping for as-synthesized AS-2 (30% pydc) sample.

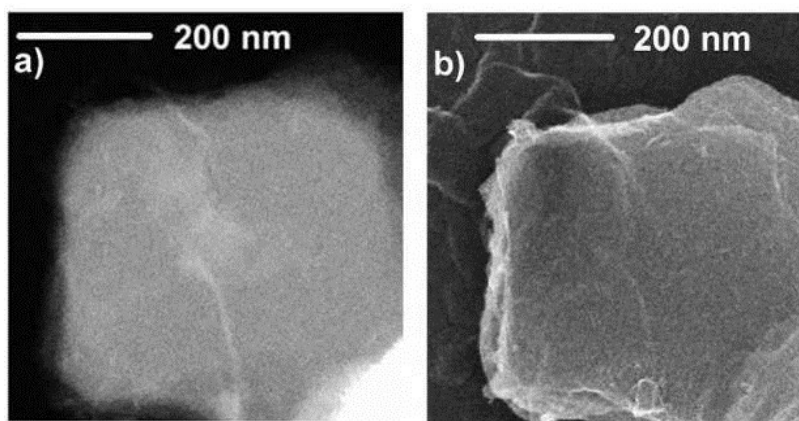

**Fig. S6** a) STEM-HAADF, b) SEI images of parent HKUST-1.

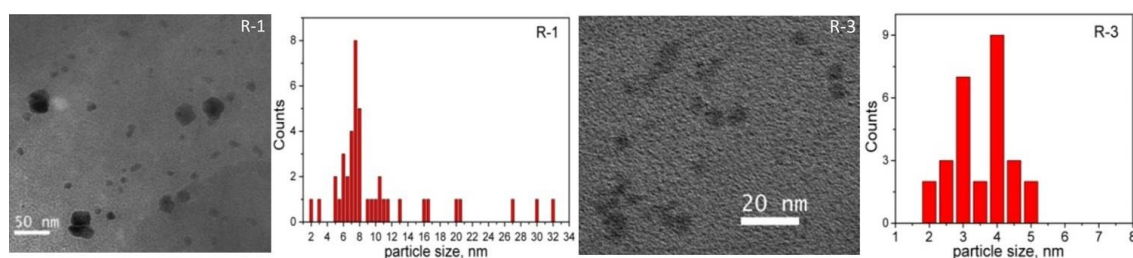

**Fig. S7** TEM images and Pd NPs size distributions for R-1 (15% pydc) and R-3 (45% pydc).

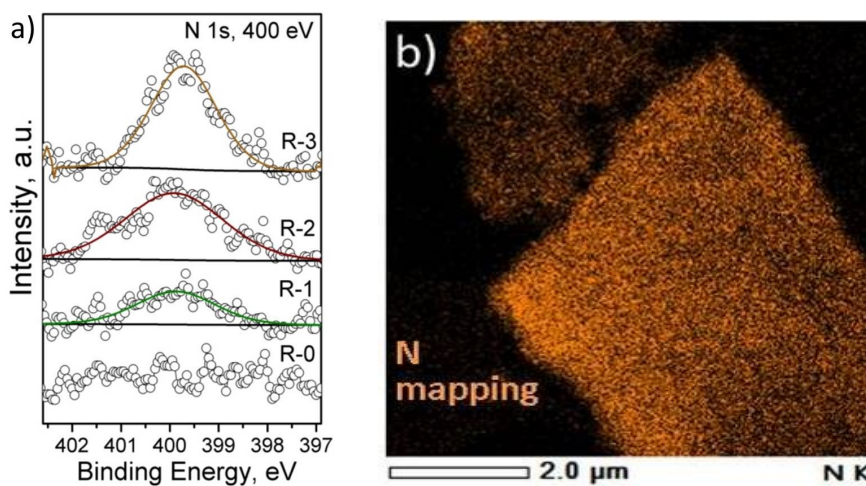

**Fig. S8** a) XP N 1s regions of R-0, R-1, R-2 and R-3. N 1s signal exclusively originates from pydc incorporation. b) EDS elemental mapping of N for R-2 (30% pydc feeding ratio).

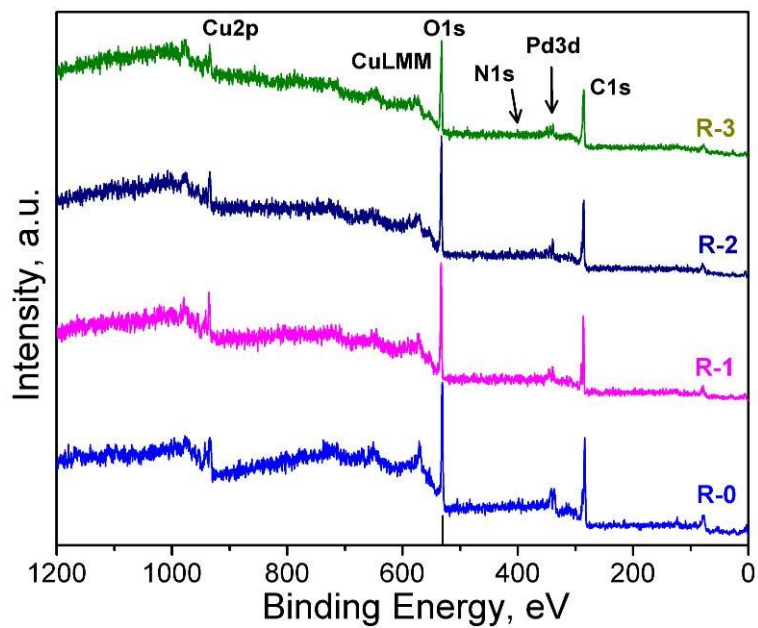

Fig. S9 XPS survey scans of R-0, R-1, R-2 and R-3.

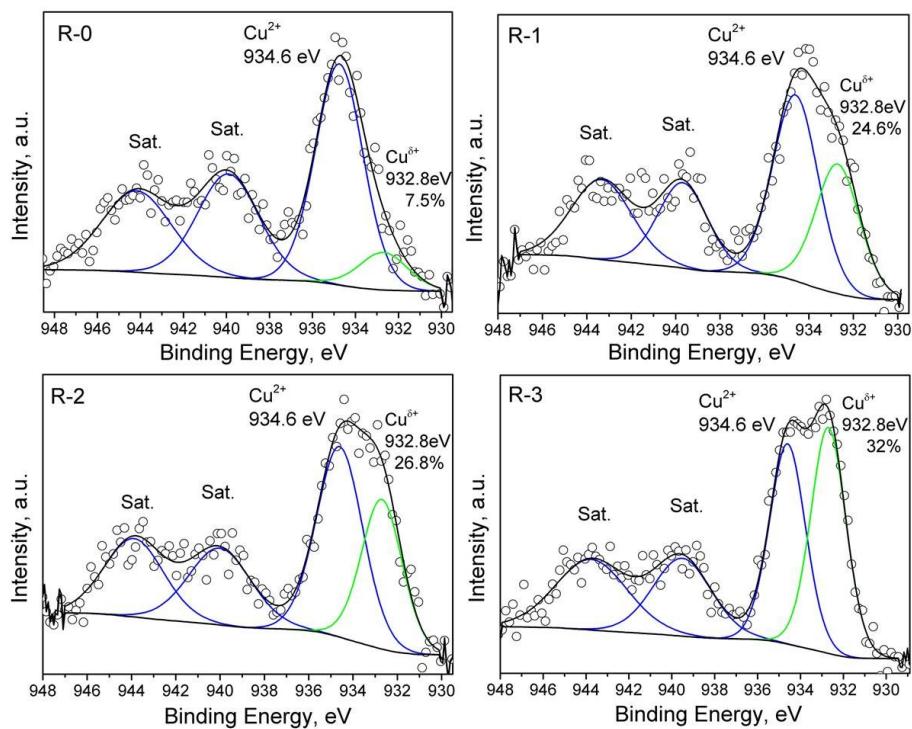

Fig. S10 XP Cu 2p region of R-0, R-1, R-2 and R-3.

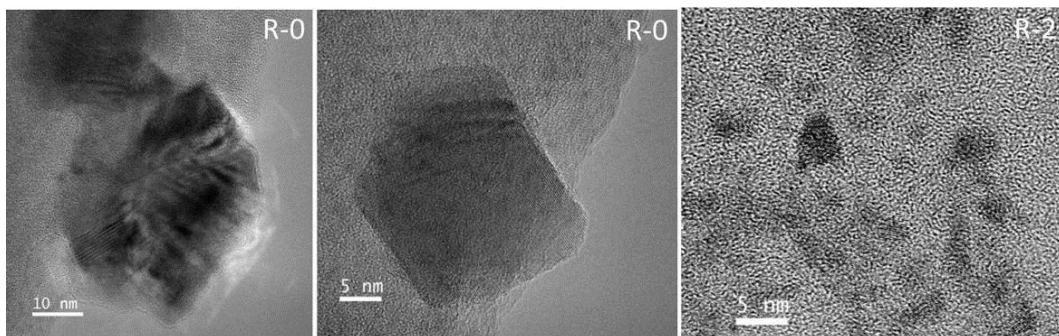

**Fig. S11** Magnified TEM images for R-0 and R-2 samples.

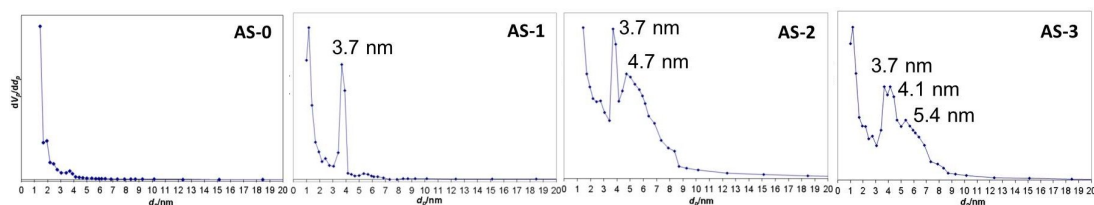

**Fig. S12** BJH plots derived from N<sub>2</sub> physisorption isotherms of the as-synthesized samples. Before the measurements, the samples were solvent-exchanged by acetone for five times and then activated at 403 K for 4 h.

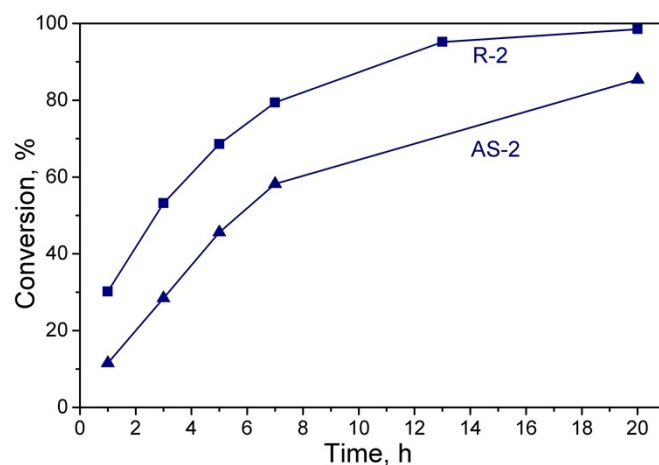

**Fig. S13** Cinnamyl alcohol oxidation using AS-2 and R-2 as catalysts.

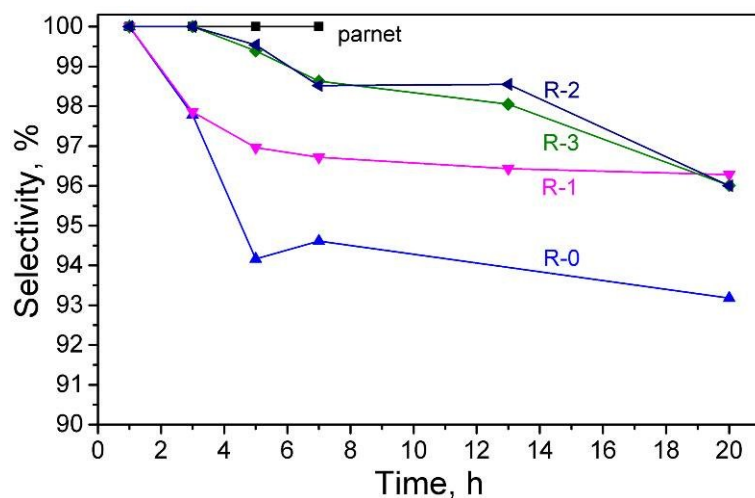

**Fig. S14** Selectivity to cinnamaldehyde as a function of time for cinnamyl alcohol oxidation.

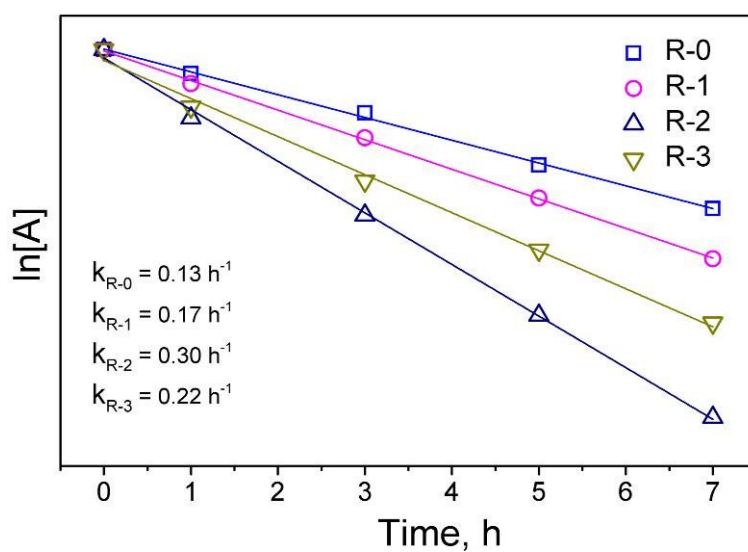

**Fig. S15** Reaction order and rate constant determination by plotting  $\ln[A]$  with respect to time for R-0, R-1, R-2 and R-3. The oxidation of cinnamyl alcohol is determined to be a first-order reaction. The reaction rate constant  $k$  is calculated by  $\ln[A] = -kt + \ln[A_0]$ , where  $[A]$ ,  $[A_0]$ ,  $k$ , and  $t$  are reactant concentration, initial reactant concentration, rate constant and reaction time, respectively.



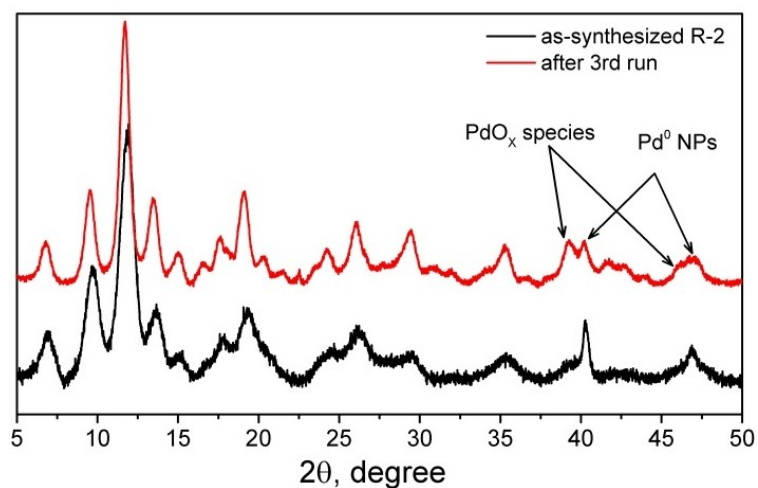

**Fig. S16** Powder XRD patterns of R-2, freshly synthesized and after the third cycle.

**Table S1.** Effect of stirring speed on the conversion of cinnamyl alcohol.

| Stirring speed (rpm) | 300   | 500   | 700   | 1000  |
|----------------------|-------|-------|-------|-------|
| Conversion (%)       | 62.86 | 82.30 | 88.05 | 87.85 |

Reaction conditions: 50 mg R-2, 1 mmol cinnamyl alcohol, 20 mL toluene, 393 K, 5 bar O<sub>2</sub> pressure, 7h.
